# Supplementary figures and images for: circExp database: an online transcriptome platform for human circRNA expressions in cancers
Source: Oxford University Press journal article supplement (doi:10.1093/database/baab045), 2021-01-01

p-value =  $2.7\text{e-}300$

R = 0.36

log<sub>2</sub>(AXIN1 TPM)

6  
5  
4  
3  
2  
1  
0

0 1 2 3 4 5 6 7

log<sub>2</sub>(GSK3B TPM)

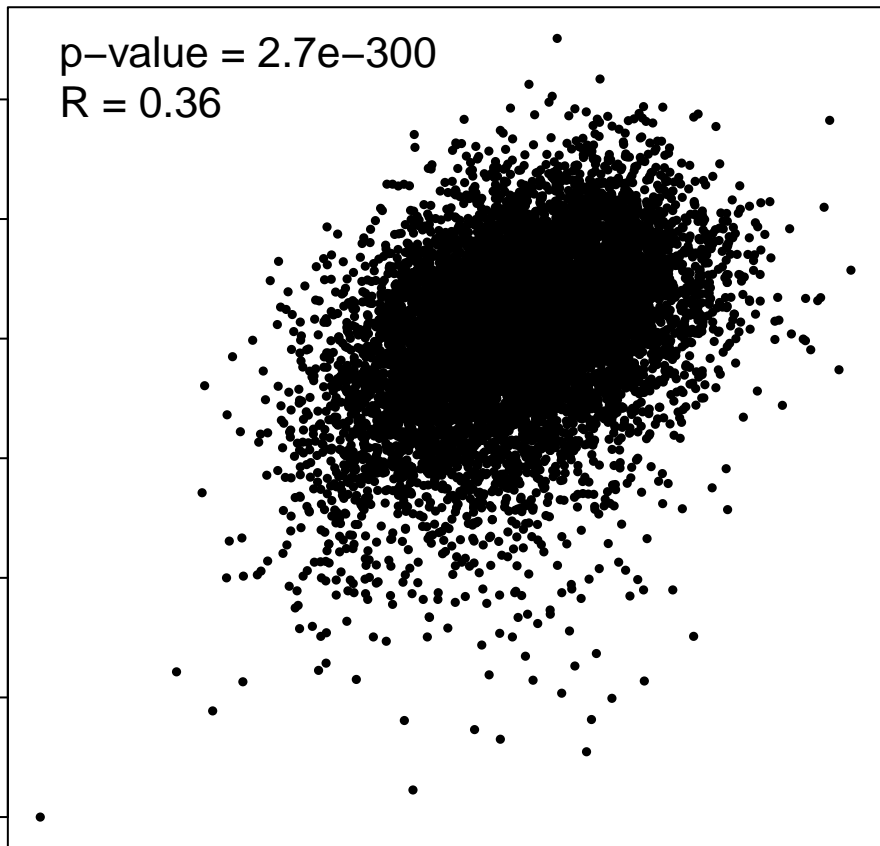

Supplement: baab045_supp.zip [file baab045_supp.zip]

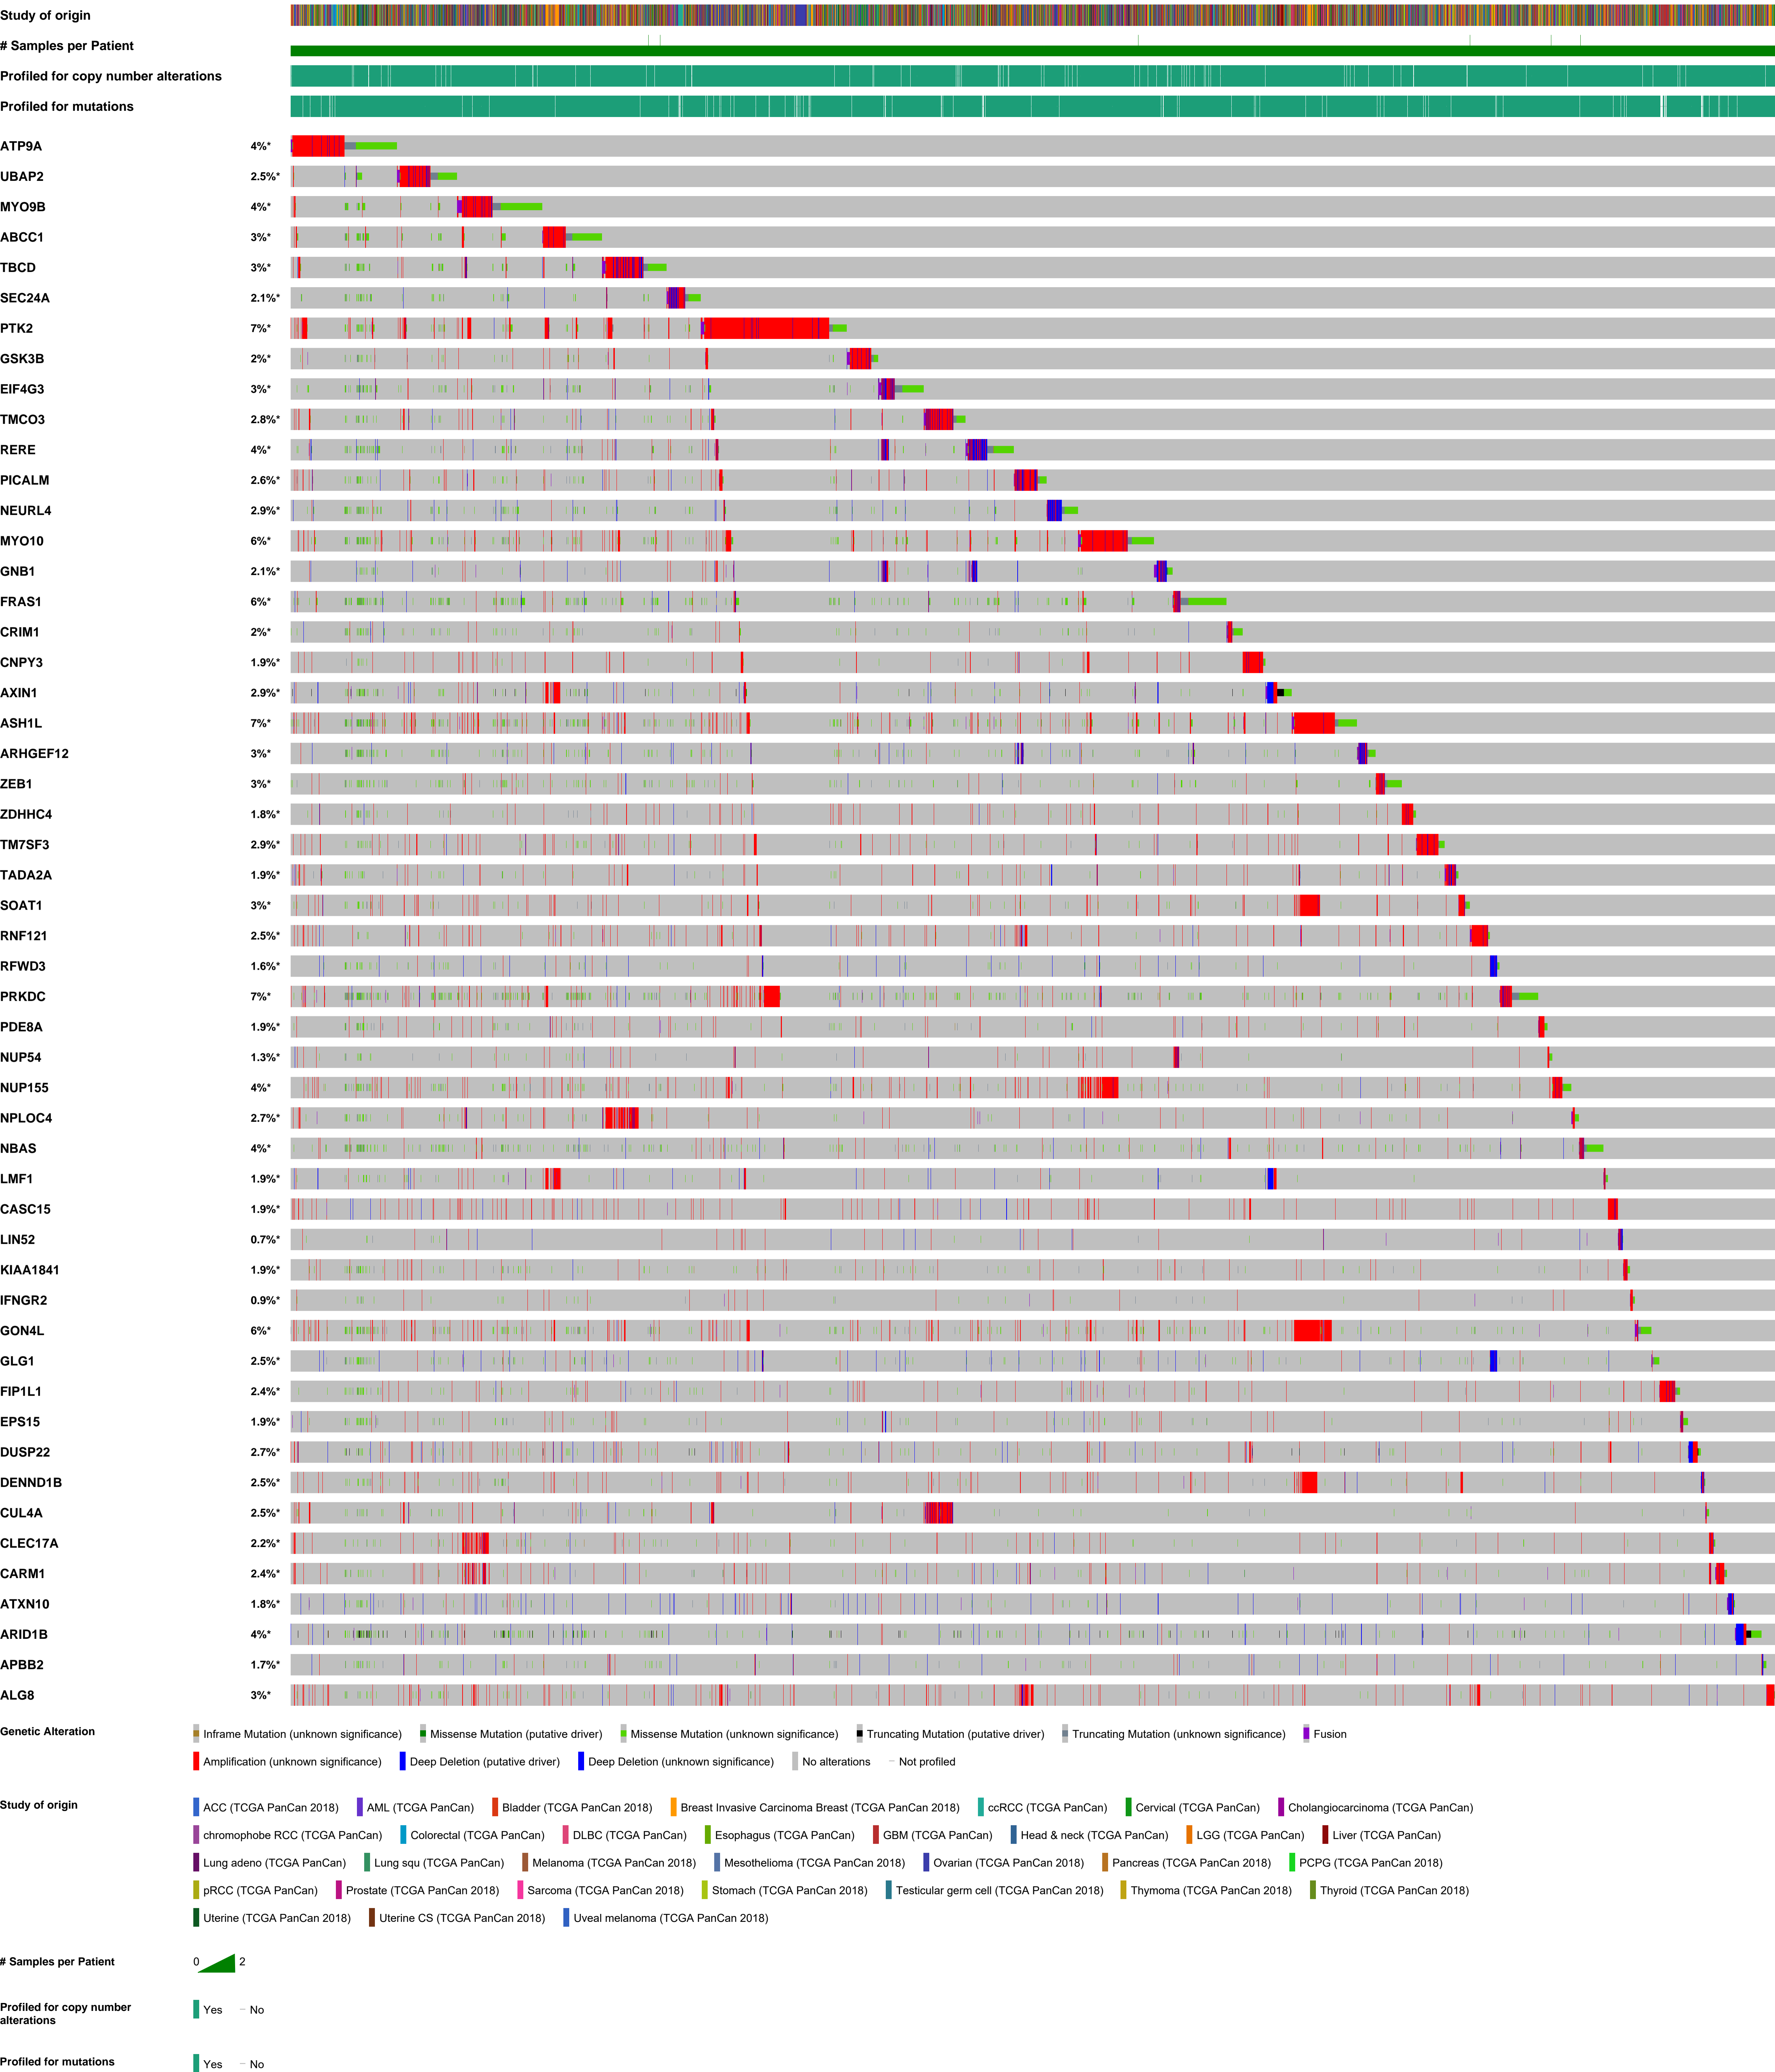

Supplement: baab045_supp.zip [file baab045_supp.zip]
